# Supplementary material for: Immune Effects of the Nitrated Food Allergen Beta-Lactoglobulin in an Experimental Food Allergy Model
Source: MDPI journal article supplement (doi:10.3390/nu11102463), 2019-10-15
Supplement: s1 [file s1]

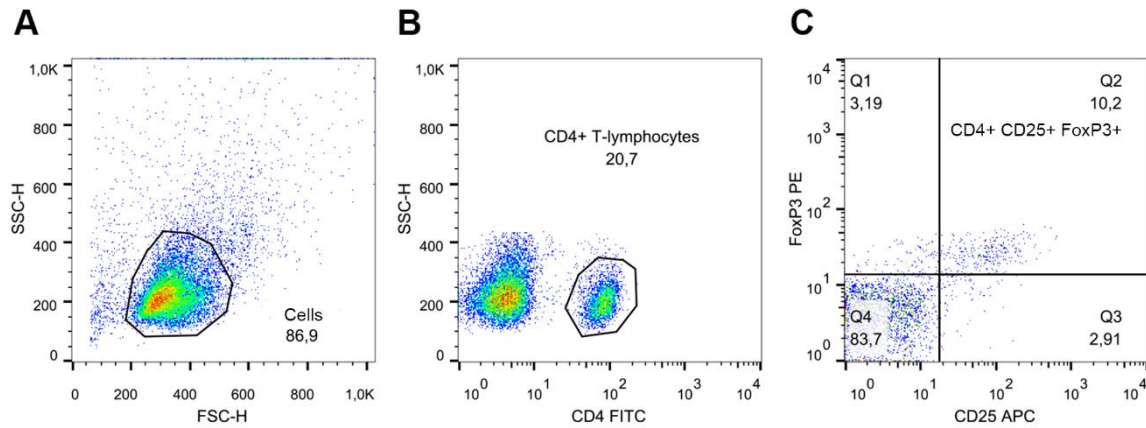

## Supporting Information 2

**Exemplary gating strategy of Tregs from isolated spleen cells.** **(A)** Cells were identified according to forward (FSC) and side scatter (SSC) characteristics. **(B)** CD4+ lymphocytes were gated and **(C)** analyzed for CD25 and FoxP3. Cells positive for all three markers were identified as Tregs. Numbers indicate percentage of gated cells. FSC, forward scatter; SSC, side scatter; Tregs, regulatory T cells; Q, quadrant
