# Supplementary material for: Immune Effects of the Nitrated Food Allergen Beta-Lactoglobulin in an Experimental Food Allergy Model
Source: MDPI journal article supplement (doi:10.3390/nu11102463), 2019-10-15
Supplement: s1 [file s1]

A

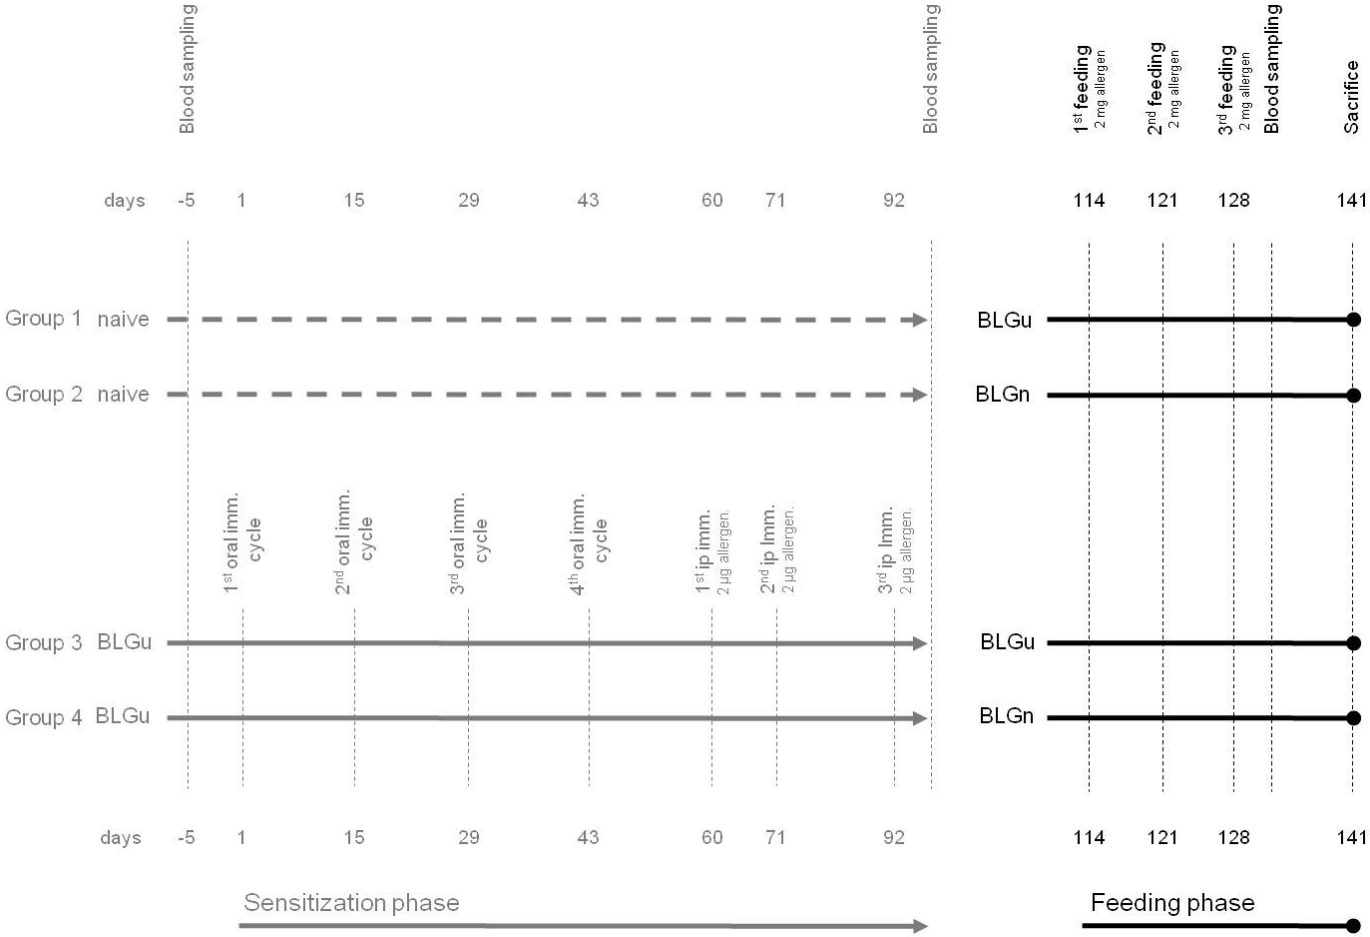

B

**Oral immunization cycle**

| day | pre-treatment | allergen gavage                  |
|-----|---------------|----------------------------------|
| 1   | 116 µg PPI iv |                                  |
| 2   | 116 µg PPI iv | 200 µg BLGu + 2 mg sucralfate ig |
| 3   | 116 µg PPI iv | 200 µg BLGu + 2 mg sucralfate ig |

**Supporting Information 1**

**Schematic depiction of mouse experiments. (A)** Feeding protocol of naïve mice (groups 1 and 2) and treatment protocol for allergy induction and subsequent feedings. **(B)** Detailed schedule and protocol of oral immunization cycles. BLG, beta-lactoglobulin; BLGn, nitrated BLG; BLGu, untreated BLG; PPI, proton pump inhibitor; ip, intraperitoneal
