# Supplementary material for: Immune Effects of the Nitrated Food Allergen Beta-Lactoglobulin in an Experimental Food Allergy Model
Source: MDPI journal article supplement (doi:10.3390/nu11102463), 2019-10-15
Supplement: s1 [file s1]

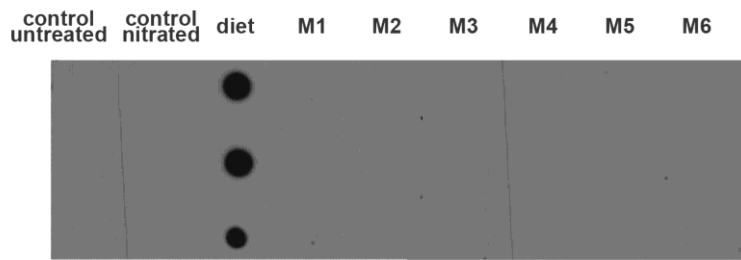

### Supporting Information 3

**Control membrane for unspecific antibody staining in dotblot experiments.** Stomach content dotted on a second membrane was incubated only with HRP-linked goat anti rabbit IgG (1:5000 in dilution buffer) to control for unspecific binding of the secondary antibody. Mouse feed displayed major unspecific binding. M, mouse; HRP, horseradish peroxidase
