# Supplementary material for: Immune Effects of the Nitrated Food Allergen Beta-Lactoglobulin in an Experimental Food Allergy Model
Source: Nutrients. 2019 Oct 15;11(10):2463. doi: 10.3390/nu11102463 (PMC6835712; doi:10.3390/nu11102463)
Supplement: Supplementary file 1 [file nutrients-11-02463-s001.zip]

Archive with 5 entries (5 files):
- Supporting Information 1.pdf
- Supporting Information 2.pdf
- Supporting Information 3.pdf
- Supporting Information 4.pdf
- Supporting Information 5.pdf
